# Supplementary material for: Bi-allelic variants in RNF170 are associated with hereditary spastic paraplegia
Source: Nat Commun. 2019 Oct 21;10:4790. doi: 10.1038/s41467-019-12620-9 (PMC6803694; doi:10.1038/s41467-019-12620-9)
Supplement: Supplementary file 2 — Supplementary Data 1 [file 41467_2019_12620_MOESM2_ESM.xlsx]

## Sheet: Tabelle1
Additional variants identified by whole exome sequencing
gene	genomic variant (hg19)	zygosity	cDNA	protein effect	mutation type	gnomAD MAF	PolyPhen	CADD score	segregation supports pathogenicity / exclusion based on gnomAD and ClinVar data
Family A
DNAH5	chr5:13714683T>C	het	NM_001369.2:c.12956A>G	p.Asn4319Ser	missense	0.00001626		25200	excluded (in cis, paternal)
DNAH5	chr5:13716802G>A	het	NM_001369.2:c.12706-3C>T	p.?	splice region	0		10910
FCRL2	chr1:157737105C>T	het	NM_030764.3:c.1078G>A	p. Ala360Thr	missense	0.00002886	0.78	12890	excluded (in cis, paternal)
FCRL2	chr1:157738309G>T	het	NM_030764.3:c.778C>A	p. Leu260Met	missense	0.002774	0.951	12400
GPR98	chr5:89925235G>T	het	NM_032119.3:c.1718G>T	p. Gly573Val	missense	0.0002925	1.0	18180	excluded (in cis, maternal)
GPR98	chr5:90012539G>A	het	NM_032119.3:c.9440G>A	p. Arg3147Gln	missense	0.0003002	0.09	15960
RNF170	chr8:42720556T>C	hom	NM_030954.3:c.396+3A>G	p.Ala109Asnfs*9	splice region	0.000004067	N/A	N/A	yes
ZNF646	chr16:31090120C>G	het	NM_014699.3:c.2475C>G	p. Asp825Glu	missense	0.0006352	0.347	14200	excluded (both parents carry both variants)
ZNF646	chr16:31090182G>T	het	NM_014699.3:c.2537G>T	p. Gly846Val	missense	0.0006352	1.000	18280
Family B
LRP2	chr2:170103277T>C	hom	NM_004525:c.3128A>G	p.Tyr1043Cys	missense	0.001237	0.976	2282	Homozygotes in gnomAD
TBC1D1	chr4:38119778C>T	hom	NM_001253913:c.218C>T	p.Ser73Leu	missense	0	1.0	5548
FAT2	chr5:150946845T>C	hom	NM_001447:c.1648A>G	p.Ile550Val	missense	0	0.001	.
GALNT10	chr5:153755996A>G	hom	NM_198321:c.728A>G	p.Asn243Ser	missense	0.00006301	0.407	5093
SOX30	chr5:157078542T>A	hom	NM_007017:c.545A>T	p.Glu182Val	missense	0	0.474	1856
WWC1	chr5:167841361A>C	hom	NM_001161661:c.950A>C	p.Asn317Thr	missense	0.00007837	0.79	2854	Homozygotes in gnomAD
SLIT3	chr5:168175431C>T	hom	NM_001271946:c.2146G>A	p.Glu716Lys	missense	0.00004097	0.67	5545
DOCK2	chr5:169506011C>T	hom	NM_004946:c.5027C>T	p.Pro1676Leu	missense	0.00004064	0.003	2098
TBC1D9B	chr5:179298491C>T	hom	NM_015043:c.2455G>A	p.Glu819Lys	missense	0.002478	0.999	5563	Homozygotes in gnomAD
RNF170	chr8:42725165A>G	hom	NM_030954:c.304T>C	p.Cys102Arg	missense	0.000004063	1.0	3570	yes
NSMAF	chr8:59512566C>G	hom	NM_001144772:c.1388G>C	p.Trp463Ser	missense	0.00008308	0.999	4116
MUC5B	chr11:1272554C>T	hom	NM_002458:c.14444C>T	p.Thr4815Met	missense	0.0002531	0.016	.	Homozygotes in gnomAD
DYNC2H1	chr11:103074487T>G	hom	NM_001080463:c.8293T>G	p.Phe2765Val	missense	0.0002781	0.063	1593
ZPR1	chr11:116658609C>T	hom	NM_001317086:c.G98G>A	p.Arg33Gln	missense	0	0.372	4268	Excluded (affected siblings not carriers)
CEP164	chr11:117258058C>T	hom	NM_001271933:c.1873C>T	p.Arg625Trp	missense	0.00004335	0.534	.	Homozygotes in gnomAD
DDX11	chr12:31256280G>C	hom	NM_001257144:c.2482G>C	p.Glu828Gln	missense	0.00004217	0.025	.
SCAF11	chr12:46321482G>C	hom	NM_004719:c.2002C>G	p.Leu668Val	missense	0.001675	0.067	.	Homozygotes in gnomAD
ADCY6	chr12:49165648G>A	hom	NM_015270:c.2896C>T	p.Arg966Cys	missense	0.0002309	0.943	4045
PRPF40B	chr12:50026828A>G	hom	NM_012272:c.296A>G	p.Asp99Gly	missense	0.00002594	0.994	4029
ITGB7	chr12:53586637G>C	hom	NM_000889:c.1784C>G	p.Ala595Gly	missense	0.00002041	0.877	4588
LRP1	chr12:57587039G>A	hom	NM_002332:c.7636G>A	p.Gly2546Ser	missense	0.003215	0.227	2981	Homozygotes in gnomAD
INHBE	chr12:57849372G>A	hom	NM_031479:c.53G>A	p.Arg18Gln	missense	0.001446	0.001	.
GLI1	chr12:57860080G>A	hom	NM_001160045:c.436G>A	p.Gly274Ser	missense	0.00001444	0.295	3100
KRTAP2-2	chr17:39211165T>C	hom	NM_033032:c.299A>G	p.Gln100Arg	missense	0	0.015	.
KRT15	chr17:39674986C>A	hom	NM_002275:c.94G>T	p.Gly32Trp	missense	0.0005462	0.721	1350
CALCOCO2	chr17:46940288A>G	hom	NM_001261393:c.1136A>G	p.Asn379Ser	missense	0.00001624	0.004	2650
QRICH2	chr17:74289540G>A	hom	NM_032134:c.770C>T	p.Pro257Leu	missense	0.00003229	0.001	.
GATA6	chr18:19762940C>T	hom	NM_005257:c.1556C>T	p.Thr519Ile	missense	0	0.01	3202
NPC1	chr18:21128069T>C	hom	NM_000271:c.1658A>G	p.Gln553Arg	missense	0	0.007	2032	Excluded (affected siblings not carriers)
ARHGAP8	chr22:45182453G>A	hom	NM_001017526:c.G46G>A	p.Asp16Asn	missense	0.0003777	0.996	2849
CELSR1	chr22:46777744G>A	hom	NM_014246:c.7087C>T	p.Arg2363Trp	missense	0.0001043	0.868	2416
CELSR1	chr22:46929811G>A	hom	NM_014246:c.3257C>T	p.Thr1086Met	missense	0.0001710	0.997	3005
Family C
DMBT1	chr10:124345813A>G	hom	NM_007329.2:c.1697A>G	p.Asn566Ser	missense	0.001102	0.002	0.001
TTC40	chr10:134736171G>A	hom	NM_001200049.2:c.1298C>T	p.Ala433Val	missense	0.0005451		24.4
FRG2B	chr10:135438943A>T	comp-het	NM_001080998.1:c.497T>A	p.Val166Asp	missense	0.001754	0.001	2.235
FRG2B	chr10:135438961C>T	comp-het	NM_001080998.1:c.479G>A	p.Arg160Lys	missense	0.0007436	0.015	2.141
KMT2D	chr12:49425640G>A	comp-het	NM_003482.3:c.12848C>T	p.Pro4283Leu	missense	0.00005377	0.011	15.98
KMT2D	chr12:49433958G>A	comp-het	NM_003482.3:c.7595C>T	p.Ser2532Phe	missense	0.00001810	0.598	23.2
PZP	chr12:9333626G>A	comp-het	NM_002864.2:c.1792C>T	p.Gln598Ter	nonsense	0.006087		36
PZP	chr12:9346789A>T	comp-het	NM_002864.2:c.1138T>A	p.Phe380Ile	missense	0.001450	0	0.116
OR10G2	chr14:22102278G>A	hom	NM_001005466.1:c.721C>T	p.Arg241Trp	missense	0.00002973	0.956	22.9
CDH13	chr16:82660738C>A	hom	NM_001257.4:c.41C>A	p.Ser14Tyr	missense	0.00005735	0.979	24
TAF1C	chr16:84212986G>A	hom	NM_005679.3:c.2171C>T	p.Ala724Val	missense	0.00006482	0.929	32
TEX14	chr17:56646622C>T	hom	NM_031272.4:c.3818-1G>A	p.?	splice	0.0009735		23.2	Homozygotes in gnomAD
CHD1L	chr1:146759387A>G	hom	NM_004284.4:c.2295A>G	p.Ile765Met	missense	0.001676	0.003	12.49	Homozygotes in gnomAD
RPRD2	chr1:150444791G>T	hom	NM_015203.3:c.3367G>T	p.Ala1123Ser	missense	0	0.025	12.61
CENPF	chr1:214795611A>G	hom	NM_016343.3:c.1055A>G	p.Gln352Arg	missense	0.0007231	0.993	27.4	Homozygotes in gnomAD
USH2A	chr1:216243451T>G	hom	NM_206933.2:c.6041A>C	p.Asn2014Thr	missense	0.0008305	0	0.593	Homozygotes in gnomAD
USH2A	chr1:216243499C>T	hom	NM_206933.2:c.5993G>A	p.Arg1998His	missense	0.0008377	0.003	10.49	Homozygotes in gnomAD
PCNXL2	chr1:233122113C>T	comp-het	NM_014801.3:c.5965G>A	p.Ala1989Thr	missense	0.002786	0	5.501	Homozygotes in gnomAD
PCNXL2	chr1:233394362CT>C	comp-het	NM_014801.3:c.1245delA	p.Ala417ArgfsTer14	frameshift	0
KCNG1	chr20:49626291G>C	hom	NM_002237.3:c.585C>G	p.Asp195Glu	missense	0.000004277	0.002	9.85
SELM	chr22:31501192ACCTCTAGTT>A	hom	NM_080430.2:c.272_279+1delAACTAGAGG	p.?	splice	0.0002191
TRIOBP	chr22:38136941C>T	hom	NM_001039141.2:c.5224C>T	p.Leu1742Phe	missense	0.001175	0.052	19.89	ClinVar: likely benign
SGSM3	chr22:40801283G>A	hom	NM_015705.4:c.613G>A	p.Gly205Ser	missense	0.00003238	0.507	24.6
BOD1L1	chr4:13604226C>A	comp-het	NM_148894.2:c.4298G>T	p.Gly1433Val	missense	0	0.483	6.085
ARHGAP10	chr4:148968172G>A	hom	NM_024605.3:c.1997G>A	p.Gly666Glu	missense	0.001540	0.036	0.136	Homozygotes in gnomAD
NOP14	chr4:2941045T>A	comp-het	NM_003703.1:c.2344A>T	p.Ser782Cys	missense	0.0006492	0.055	16.74	Homozygotes in gnomAD
NOP14	chr4:2941320C>T	comp-het	NM_003703.1:c.2252G>A	p.Arg751Gln	missense	0.0004906	0.005	9.184
DAAM2	chr6:39846997C>T	hom	NM_015345.3:c.1589C>T	p.Thr530Ile	missense	0	0.002	13.78
MUC12	chr7:100635223T>A	comp-het	NM_001164462.1:c.1379T>A	p.Val460Asp	missense	0.00001409	0.059	6.676
MUC12	chr7:100638705G>T	comp-het	NM_001164462.1:c.4861G>T	p.Gly1621Cys	missense	0.0003701	0.198	0.647	Homozygotes in gnomAD
FAM160B2	chr8:21955765G>T	hom	NM_022749.5:c.712G>T	p.Gly238Cys	missense	0.0001715	0.033	23.1
RLN1	chr9:5339729C>A	hom	NM_006911.3:c.18G>T	p.Leu6Phe	missense	0.0001143	0.032	24.3	Homozygotes in gnomAD
GLDC	chr9:6592921C>T	hom	NM_000170.2:c.1331G>A	p.Cys444Tyr	missense	0.0007395	0.033	25.3	Homozygotes in gnomAD
Family D
CPSF3L	chr1:1247988G>A	hom	NM_001256456.1:c.1405C>T	p.Arg469Trp	missense	0.00003166	0.01	24.8
RNF170	chr8: 42711560_42711561delTC	hom	NM_030954.3:c.518_519del	p.Arg173Asnfs*49	frameshift	0			yes
PGAP3	chr17:37829776C>T	hom	NM_033419.3:c.685G>A	p.Val229Met	missense	0.00003971	0.04	32
