# Supplementary material for: Bi-allelic variants in RNF170 are associated with hereditary spastic paraplegia
Source: Nat Commun. 2019 Oct 21;10:4790. doi: 10.1038/s41467-019-12620-9 (PMC6803694; doi:10.1038/s41467-019-12620-9)
Supplement: Supplementary file 11 — Source Data [file 41467_2019_12620_MOESM11_ESM.xlsx]

## Sheet: Figure 1 c RT-PCR
Family A RT-PCR:

## Sheet: Figure 1 e qPCR
Family A qPCR:
Relative Quantification: all to mean RNF170_2 PaxGene_Fibroblasten_Lauf 1_11_10_17
RNF170_2 Pax Gene all to mean
					Target		Reference		Ratio
Chart	Pairing	Sample Name	Targets	References	Mean Cp	CP Error	Mean Cp	Cp Error	Target/Ref	Target/Ref Error	Normalized	Normalized Error	Target/Ref SP/CO	Status
True		Cali	RNF170_2	RNF10;RNF111;RPLP0	21.9261	0.135902	15.945	0.4396	0.2561	0.043	1			E - Extrapolated Standard Curve
True	A11/A2	PG-SP-171	RNF170_2	RNF10;RNF111;RPLP0	23.1498	1.21279	16.431	1.56861	0.135	0.1205	0.5272	0.4899	0.482143
True	D11/D2	PG-CO-4	RNF170_2	RNF10;RNF111;RPLP0	23.176	1.11965	16.7592	1.4835	0.1641	0.1784	0.6409	0.7181
True	G11/G2	PG-CO-5	RNF170_2	RNF10;RNF111;RPLP0	21.6429	0.435164	16.3553	1.25314	0.3653	0.116	1.427	0.5054
True	J11/J2	PG-CO-6	RNF170_2	RNF10;RNF111;RPLP0	22.4284	0.376408	16.8007	1.54593	0.3106	0.0964	1.213	0.4347
RNF170_2 Fibros all to mean
					Target		Reference		Ratio
Chart	Pairing	Sample Name	Targets	References	Mean Cp	CP Error	Mean Cp	Cp Error	Target/Ref	Target/Ref Error	Normalized	Normalized Error	Target/Ref SP/CO	Status
True		Cali	RNF170_2	RNF10;RNF111;RPLP0	21.9261	0.135902	15.945	0.4396	0.2561	0.043	1			E - Extrapolated Standard Curve
True	M11/M2	F-SP_171	RNF170_2	RNF10;RNF111;RPLP0	20.8354	0.61249	15.9114	2.82214	0.516	0.1797	2.015	0.7923	0.35806
True	A12/A3	F-CO-9	RNF170_2	RNF10;RNF111;RPLP0	19.081	0.315669	16.9462	2.19578	2.637	0.5495	10.3	2.79
True	D12/D3	F-CO-23	RNF170_2	RNF10;RNF111;RPLP0	20.1974	0.108564	16.4122	2.58696	1.016	0.1277	3.969	0.8301
True	G12/G3	F-CO-61	RNF170_2	RNF10;RNF111;RPLP0	19.4722	0.524465	15.1553	3.05289	0.6703	0.1873	2.617	0.8664
Relative Quantification: all to mean RNF170_2 PaxGene_Fibroblasten_Lauf 2_24_10_17
RNF170_2 Pax Gene all to mean
					Target		Reference		Ratio
Chart	Pairing	Sample Name	Targets	References	Mean Cp	CP Error	Mean Cp	Cp Error	Target/Ref	Target/Ref Error	Normalized	Normalized Error	Target/Ref SP/CO	Status
True		Cali	RNF170_2	RNF10;RNF111;RPLP0	21.7574	0.318291	16.2994	0.679305	0.3583	0.0671	1
True	A11/A2	PG-SP-171	RNF170_2	RNF10;RNF111;RPLP0	23.0868	1.03483	16.6274	1.46985	0.1943	0.1049	0.5423	0.3211	0.715127
True	D11/D2	PG-CO-4	RNF170_2	RNF10;RNF111;RPLP0	22.8553	1.00087	16.8608	1.56692	0.2531	0.1515	0.7065	0.4579
True	G11/G2	PG-CO-5	RNF170_2	RNF10;RNF111;RPLP0	21.5201	0.439363	16.0858	1.08965	0.3622	0.1038	1.011	0.356
True	J11/J2	PG-CO-6	RNF170_2	RNF10;RNF111;RPLP0	23.2699	0.914343	16.8351	1.59685	0.1998	0.0884	0.5577	0.2781
RNF170_2 Fibros all to mean
					Target		Reference		Ratio
Chart	Pairing	Sample Name	Targets	References	Mean Cp	CP Error	Mean Cp	Cp Error	Target/Ref	Target/Ref Error	Normalized	Normalized Error	Target/Ref SP/CO	Status
True		Cali	RNF170_2	RNF10;RNF111;RPLP0	21.7574	0.318291	16.2994	0.679305	0.3583	0.0671	1
True	M11/M2	F-SP_171	RNF170_2	RNF10;RNF111;RPLP0	20.6634	0.374239	16.0182	2.8284	0.5669	0.1203	1.582	0.4596	0.384148
True	A12/A3	F-CO-9	RNF170_2	RNF10;RNF111;RPLP0	18.9962	0.402986	16.8744	2.16023	2.436	0.4881	6.801	1.915
True	D12/D3	F-CO-23	RNF170_2	RNF10;RNF111;RPLP0	19.8974	0.11025	16.3539	2.59608	1.07	0.1193	2.985	0.6619
True	G12/G3	F-CO-61	RNF170_2	RNF10;RNF111;RPLP0	19.2432	0.278336	15.412	2.82818	0.9212	0.1438	2.571	0.6408
Relative Quantification: all to mean RNF170_2 PaxGene_Fibroblasten_Lauf 3_26_10_17
RNF170_2 Pax Gene all to mean
					Target		Reference		Ratio
Chart	Pairing	Sample Name	Targets	References	Mean Cp	CP Error	Mean Cp	Cp Error	Target/Ref	Target/Ref Error	Normalized	Normalized Error	Target/Ref SP/CO	Status
True		Cali	RNF170_2	RNF10;RNF111;RPLP0	21.9991	0.198834	16.2408	0.734036	0.2499	0.0483	1
True	B11/A2	PG-SP-171	RNF170_2	RNF10;RNF111;RPLP0	23.6533	0.25401	16.47	1.47648	0.107	0.0246	0.4281	0.1269	0.448074
True	D11/D2	PG-CO-4	RNF170_2	RNF10;RNF111;RPLP0	22.8832	1.13967	16.841	1.54906	0.2137	0.1279	0.8555	0.5515
True	G11/G2	PG-CO-5	RNF170_2	RNF10;RNF111;RPLP0	21.7234	0.220664	16.3303	1.10237	0.3161	0.0748	1.265	0.3824
True	J11/J2	PG-CO-6	RNF170_2	RNF10;RNF111;RPLP0	23.1107	0.490844	16.7831	1.48299	0.1866	0.0593	0.7468	0.2791
RNF170_2 Fibros all to mean
					Target		Reference		Ratio
Chart	Pairing	Sample Name	Targets	References	Mean Cp	CP Error	Mean Cp	Cp Error	Target/Ref	Target/Ref Error	Normalized	Normalized Error	Target/Ref SP/CO	Status
True		Cali	RNF170_2	RNF10;RNF111;RPLP0	21.9991	0.198834	16.2408	0.734036	0.2499	0.0483	1
True	M11/M2	F-SP_171	RNF170_2	RNF10;RNF111;RPLP0	20.6993	0.244549	15.9342	2.80612	0.4731	0.1116	1.893	0.5729	0.341893
True	A12/A3	F-CO-9	RNF170_2	RNF10;RNF111;RPLP0	18.9015	0.206669	16.838	2.18837	2.54	0.4257	10.17	2.538
True	D12/D3	F-CO-23	RNF170_2	RNF10;RNF111;RPLP0	19.8879	0.323943	16.271	2.58148	0.9647	0.2428	3.861	1.224
True	G12/G3	F-CO-61	RNF170_2	RNF10;RNF111;RPLP0	19.3	0.288208	14.933	3.24793	0.6466	0.1152	2.588	0.6704		C, N, E - Target/Reference ratio uncertain, Normalized ratio uncertain, Extrapolated Standard Curve

## Sheet: Figure 1 f RNF170 WB
Family A RNF170 WB:

## Sheet: Figure 2 a+b
		WB 1
			Quantification Data:
			WB 1	Cell lines	IP3R-3	Vinculin	normalized to Vinculin	normalized to A.4
			1	A.4	5.15925e+06	3600692	1.43285	1
			2	C.4	3.28928e+06	3478596	0.945576	0.659927
			3	Co1	1.45851e+06	2533588	0.575668	0.401764
			4	Co2	1.18669e+06	2514900	0.471865	0.329319
			5	Co3	2.44434e+06	3330256	0.733979	0.512251
			6	Co4	3.06981e+06	3423332	0.896733	0.625838						WB 3:
WB 2:			7	Co5	2.54997e+06	3319724	0.768126	0.536082
Quantification Data:
WB 2:														WB 3:
	Cell lines	IP3R-3	Vinculin	Normalized to Vinculin											Cell lines	IP3R-3	Vinculin	Normalized to Vinculin
1	A.4	8986.37	15261	0.588846										1	A.4	11870.8	15250.3	0.778393
2	Co1	1212.13	13546.4	0.0894802										2	Co1	565.062	12802.9	0.0441356
3	Co2	4676.42	16122	0.290064										3	Co2	1432.26	13753.1	0.104141
4	Co3	1487.18	18078.7	0.0822617										4	Co3	2067.6	13634.9	0.15164
5	Co4	1583.26	13503.1	0.117251										5	Co4	782.113	14092.8	0.0554973
6	A.4	9202.15	16381.2	0.561752
7	Co1	2660.2	13589.5	0.195754
8	Co2	4991.64	15009.5	0.332566
9	Co3	3656.57	13741.6	0.266096
WB 4:
Quantification Data:
WB 4:
	Cell lines	IP3R-3	Vinculin	Normalized to Vinculin
	A.4	2.12208e+06	3.33601e+06	0.636112
	C.4	2.07805e+06	3.35341e+06	0.619683
	Co1	1.0505e+06	3.15746e+06	0.332704
	Co2	1.13919e+06	3.76972e+06	0.302195
	A.4	3.08242e+06	4.68694e+06	0.657662
	C.4	2.28769e+06	3.88392e+06	0.589016
	Co1	721096	3.62377e+06	0.19899
	Co2	1.31145e+06	4.05998e+06	0.323019
WB5								WB6							WB7
WB 5:								WB 6:							WB 7:
	Cell lines	IP3R-3	Vinculin	Normalized to Vinculin					Cell lines	IP3R-3	Vinculin	Normalized to Vinculin				Cell lines	IP3R-3	Vinculin	Normalized to Vinculin
	C.4 basal	4.30706e+07	1.07251e+08	0.401586					C.4 basal	1.56726e+06	4.91024e+06	0.319182				C.4 basal	4.60798e+07	9.17659e+07	0.502145
	C.4 starved	4.52508e+07	8.79431e+07	0.514547					C.4 starved	1.33133e+06	3534996	0.376615				C.4 starved	4.31703e+07	5.19101e+07	0.831635
	A.4 basal	5.43255e+07	8.57948e+07	0.633203					A.4 basal	1.97394e+06	2.54572e+06	0.775394				A.4 basal	4.31348e+07	4.72248e+07	0.913393
	A.4 starved	5.83118e+07	9.61605e+07	0.6064					A.4 starved	1.87674e+06	2.57355e+06	0.729241				A.4 starved	4.73243e+07	3.94307e+07	1.20019
	Co1 basal	1.32269e+07	8.16252e+07	0.162044					Co1 basal	741260	2.72397e+06	0.272125				Co1 basal	1.33202e+07	3.46675e+07	0.384226
	Co1 starved	1.39951e+07	7.025e+07	0.199218					Co1 starved	591903	2.92517e+06	0.202348				Co1 starved	1.32733e+07	3.64235e+07	0.364415
	Co2 basal	9.77787e+06	8.82336e+07	0.110818					Co2 basal	541290	3.01849e+06	0.179325				Co2 basal	1.03895e+07	3.67769e+07	0.282502
	Co2 starved	1.12883e+07	9.31484e+07	0.121186					Co2 starved	686440	3.69643e+06	0.185704				Co2 starved	1.08945e+07	3.52713e+07	0.308878

## Sheet: Figure 2 c+d
WB 1:							WB2:							WB3:
WB1	Cell lines	IP3R-3	Vinculin	Normalized to Vinculin	each sample normalized to t=0		WB2	Cell lines	IP3R-3	Vinculin	Normalized to Vinculin	each sample normalized to t=0		WB3	Cell lines	IP3R-3	Vinculin	Normalized to Vinculin	each sample normalized to t=0
1	A.4 0 min	14334.9	15995.3	0.896196	1		1	A.4 0 min	10941	22434.6	0.487686	1		1	A.4 0 min	14063	22720	0.618968	1
2	A.4 30 min	15916.5	15117.6	1.05285	1.1748		2	A.4 30 min	10627.2	20840.9	0.509922	1.0456		2	A.4 30 min	10561.7	20837.3	0.506866	0.818889
3	A.4 60 min	7220.15	16130	0.447621	0.499468		3	A.4 60 min	9470.08	20805.2	0.455179	0.933345		3	A.4 60 min	19312.5	19723.5	0.979165	1.58193
4	Co1 0 min	5112.25	18057.8	0.283105	1		4	Co1 0 min	7533.64	17304.3	0.435363	1		4	Co1 0 min	3137.35	23214.5	0.135146	1
5	Co1 30 min	730.113	18000.6	0.0405606	0.143271		5	Co1 30 min	2527.91	15809.4	0.1599	0.367279		5	Co1 30 min	1025.06	23454.1	0.043705	0.32339
6	Co1 60 min	663.113	17133.7	0.0387023	0.136707		6	Co1 60 min	1843.67	16204.1	0.113778	0.26134		6	Co1 60 min	652.92	17325.6	0.0376854	0.278849
7	Co3 0 min	3825.88	13639.1	0.280509	1		7	Co3 0 min	7803.3	19677	0.39657	1		7	Co3 0 min	8758.9	17558.1	0.498853	1
8	Co3 30 min	1459.26	15135.5	0.0964129	0.343707		8	Co3 30 min	6511	20170.4	0.3228	0.81398		8	Co3 30 min	7008.12	18012.2	0.389077	0.779944
9	Co3 60 min	1580.84	18473.6	0.0855732	0.305064		9	Co3 60 min	5579.42	13844.2	0.403014	1.01625		9	Co3 60 min	4243.52	14710.8	0.288463	0.578252
WB4							WB5							WB6							WB7
WB4	Cell lines	IP3R-3	Vinculin	Normalized to Vinculin	each sample normalized to t=0		WB5	Cell lines	IP3R-3	Vinculin	Normalized to Vinculin	each sample normalized to t=0		WB6	Cell lines	IP3R-3	Vinculin	Normalized to Vinculin	each sample normalized to t=0		WB7	Cell lines	IP3R-3	Vinculin	Normalized to Vinculin	each sample normalized to t=0
1	C.4 0 min	10636952	5954692	1.78631	1		1	C.4 0 min	3892608	11744419	0.331443	1		1	C.4 0 min	2.25936e+06	1.70041e+06	1.32872	1		1	C.4 0 min	1.07636e+06	7075811	0.152118	1
2	C.4 30 min	7333312	4865216	1.50729	0.843801		2	C.4 30 min	5.11032e+06	10195332	0.501241	1.5123		2	C.4 30 min	2.2328e+06	1.5466e+06	1.44368	1.08652		2	C.4 30 min	1.54106e+06	6864704	0.22449	1.47576
3	C.4 60 min	6441107	4083932	1.57718	0.882926		3	C.4 60 min	4.71917e+06	1.00858e+07	0.467901	1.41171		3	C.4 60 min	2.72765e+06	1.25692e+06	2.1701	1.63323		3	C.4 60 min	2.10393e+06	6333576	0.332187	2.18374
4	Co1 0 min	3805084	4361864	0.872353	1		4	Co1 0 min	1.84351e+06	10999150	0.167605	1		4	Co1 0 min	958741	1.33979e+06	0.715592	1		4	Co1 0 min	887215	6515308	0.136174	1
5	Co1 30 min	2281696	5176876	0.440748	0.50524		5	Co1 30 min	2.24293e+06	10277675	0.218233	1.30207		5	Co1 30 min	675334	1.56617e+06	0.431202	0.602581		5	Co1 30 min	1.07821e+06	6658332	0.161933	1.18917
6	Co1 60 min	1825676	4425904	0.412498	0.472857		6	Co1 60 min	1643265	10482948	0.156756	0.935272		6	Co1 60 min	635877	1.66035e+06	0.382978	0.535191		6	Co1 60 min	528852	6423935	0.0823252	0.604559
7	Co2 0 min	1650528	3.01855e+06	0.546794	1		7	Co2 0 min	1358575	7037995	0.193034	1		7	Co2 0 min	401617	1.37285e+06	0.292542	1		7	Co2 0 min	207655	6293096	0.0329973	1
8	Co2 30 min	1806520	4.21136e+06	0.428964	0.784507		8	Co2 30 min	840738	9104902	0.092339	0.478355		8	Co2 30 min	326806	1.23956e+06	0.263648	0.90123		8	Co2 30 min	117111	6329616	0.018502	0.560713
9	Co2 60 min	1453528	3349416	0.433965	0.793653		9	Co2 60 min	453314	10240625	0.0442662	0.229318		9	Co2 60 min	319879	1.53411e+06	0.208511	0.712754		9	Co2 60 min	70198.4	6900574	0.0101728	0.308293

## Sheet: Figure 3 a+b
WB 1:						WB 2:
Quantification Data:
WB 1:						WB 2:
	Cell lines	IP3R-1	Vinculin	normalized to Vinculin			Cell lines	IP3R-1	Vinculin	normalized to Vinculin
1	KO basal 1	2.47085e+06	387535	6.37582		1	KO basal 1	3.21933e+06	342475	9.40019
2	KO basal 2	2.85511e+06	428007	6.67071		2	KO basal 2	2.68563e+06	369187	7.27445
3	KO basal 3	2.29919e+06	412343	5.57592		3	KO basal 3	2.69145e+06	368359	7.30658
4	WT basal 1	1.80928e+06	495799	3.64922		4	WT basal 1	3.54166e+06	659639	5.36909
5	WT basal 2	1.78447e+06	463023	3.85395		5	WT basal 2	2.57232e+06	694743	3.70255
6	WT basal 3	1.87534e+06	430475	4.35644		6	WT basal 3	2.29776e+06	693163	3.3149
7	WT rescue basal 1	1.52266e+06	271207	5.6144		7	WT rescue basal 1	2.66905e+06	399939	6.67364
8	WT rescue basal 2	1.2457e+06	216799	5.74589		8	WT rescue basal 2	1.34807e+06	289763	4.65233
9	WT rescue basal 3	769854	217515	3.53932		9	WT rescue basal 3	1.08351e+06	217587	4.97967
WB 3:
Quantification Data:
WB 3:
	Cell lines	IP3R-1	Vinculin	normalized to Vinculin
1	SH-SY5Y RNF170 KO basal 1	2.18625e+06	2424830	0.90161
2	SH-SY5Y RNF170 KO basal 2	2.71202e+06	1745022	1.55415
3	SH-SY5Y RNF170 KO basal 3	2.06655e+06	1753146	1.17877
4	SH-SY5Y RNF170 KO basal 4	1.82506e+06	2191482	0.832798
5	SH-SY5Y alt basal 1	1.37438e+06	2236830	0.614431
6	SH-SY5Y alt basal 2	1.19452e+06	2046810	0.583602
7	SH-SY5Y alt basal 3	1.09764e+06	2406130	0.456186
8	SH-SY5Y alt basal 4	764386	2109006	0.362439

## Sheet: Figure 3 c+d
WB 1:					WB 2:			WB 3:			WB 4:
	SH-SY5Y	IP3R1	Vinculin	Ratio IP3/Vinculin	normalized to 1	normalized to 100%
	WB1
1	KO 0h	3.7552e+07	9.76208e+07	0.384672	1	100
2	KO 2h	5.12711e+07	8.7686e+07	0.584713	1.52003	152.003
3	KO 4h	56523189	8.0716e+07	0.700272	1.08494	108.494
4	wt 0h	5.84702e+07	9.43047e+07	0.620013	1	100
5	wt 2h	4.34238e+07	9.63446e+07	0.450713	0.726942	72.6942
6	wt 4h	3.97882e+07	8.72553e+07	0.455997	0.735463	73.5463
7	SHSY5Y KO	5.28566e+07	6.65506e+07	0.794231
8	SHSY5Y wt	5.57626e+07	9.8657e+07	0.565217
9	SHSY5Y wt	2.75343e+07	5.75334e+07	0.478579
	WB2
1	KO 0h	2.97272e+07	9.3773e+07	0.317013	1	100
2	KO 2h	3.29169e+07	7.52751e+07	0.437288	1.3794	137.94
3	KO 4h	3.93362e+07	7.61484e+07	0.516572	1.6295	162.95
4	wt 0h	5.47617e+07	9.40376e+07	0.582338	1	100
5	wt 2h	3.62039e+07	8.60135e+07	0.420909	0.722792	72.2792
6	wt 4h	3.93318e+07	8.15231e+07	0.482462	0.828492	82.8492
7	SHSY5Y KO	3.90447e+07	6.65445e+07	0.586746
8	SHSY5Y wt	4.55291e+07	1.01886e+08	0.446863
9	SHSY5Y wt	3.5588e+07	5.73884e+07	0.620125
	WB3
1	KO 0h	3.20799e+07	5.94474e+07	0.539635	1	100
2	KO 2h	4.12633e+07	5.43919e+07	0.758629	1.40582	140.582
3	KO 4h	4.30181e+07	5.44576e+07	0.789939	1.46384	146.384
4	wt 0h	5.52239e+07	8.92685e+07	0.618627	1	100
5	wt 2h	4.59009e+07	7.38709e+07	0.621366	1.00443	100.443
6	wt 4h	4.62919e+07	7.90344e+07	0.585718	0.946804	94.6804
7	SHSY5Y wt	4.7506e+07	5.06009e+07	0.938837
8	SHSY5Y wt	5.12306e+07	8.25576e+07	0.620543
	WB4
	KO 0h	2.90005e+07	7.1009e+07	0.408406	1	100
	KO 2h	3.19202e+07	4.85615e+07	0.657315	1.60946	160.946
	KO 4h	3.92652e+07	4.60674e+07	0.852343	2.087	208.7
	wt 0h	4.65605e+07	4.89786e+07	0.95063	1	100
	wt 2h	3.71642e+07	5.37727e+07	0.691135	0.727029	72.7029
	wt 4h	2.98216e+07	5.68523e+07	0.524546	0.551787	55.1787
	SHSY5Y wt	2.64234e+07	5.24681e+07	0.503608
	SHSY5Y wt	3.8436e+07	7.9445e+07	0.483806
WB 3							WB 4
Quantification Data:
WB 3:							WB 4:
	Cell lines	IP3R-1	Vinculin	normalized to Vinculin	each sample normalized to t=0			Cell lines	IP3R-1	Vinculin	normalized to Vinculin	each sample normalized to t=0
1	SH-SY5Y RNF170 KO 0 h	4743436	3955562	1.19918	1		1	SH-SY5Y Cl. 71 + RNF170 WT 0 h	1.24679e+06	1.79182e+06	0.695824	1
2	SH-SY5Y RNF170 KO 2 h	3821176	3858478	0.990332	0.82584		2	SH-SY5Y Cl. 71 + RNF170 WT 2 h	1.53975e+06	2.15409e+06	0.714801	1.02727
3	SH-SY5Y RNF170 KO 4 h	2926356	3389394	0.863386	0.71998		3	SH-SY5Y Cl. 71 + RNF170 WT 4 h	1.13732e+06	2.13385e+06	0.53299	0.765984
4	SH-SY5Y alt 0 h	2568480	4466802	0.575015	1
5	SH-SY5Y alt 2 h	2436228	2842306	0.857131	1.49062
6	SH-SY5Y alt 4 h	2906316	3097358	0.938321	1.63182
WB 5							WB 6
Quantification Data:
WB 5:							WB 6:
	Cell lines	IP3R-1	Vinculin	normalized to Vinculin	each sample normalized to t=0			Cell lines	IP3R-1	Vinculin	normalized to Vinculin	each sample normalized to t=0
1	SH-SY5Y RNF170 KO 0 h	2.0062e+06	3.55794e+06	0.563865	1		1	SH-SY5Y Cl. 71 + RNF170 WT 0 h	1.62839e+06	1395757	1.16668	1
2	SH-SY5Y RNF170 KO 2 h	1.41121e+06	4.1002e+06	0.344181	0.610396		2	SH-SY5Y Cl. 71 + RNF170 WT 2 h	1.41903e+06	1506273	0.942077	0.807489
3	SH-SY5Y RNF170 KO 4 h	1.11645e+06	3.68545e+06	0.302934	0.537245		3	SH-SY5Y Cl. 71 + RNF170 WT 4 h	1.25914e+06	1344721	0.936357	0.802586
4	SH-SY5Y alt 0 h	1.10335e+06	3.30589e+06	0.333754	1
5	SH-SY5Y alt 2 h	698284	3.01289e+06	0.231766	0.694421
6	SH-SY5Y alt 4 h	786810	2.11713e+06	0.37164	1.11351
WB 7							WB 8
Quantification Data:
WB 7:							WB 8:
	Cell lines	IP3R-1	Vinculin	normalized to Vinculin	each sample normalized to t=0			Cell lines	IP3R-1	Vinculin	normalized to Vinculin	each sample normalized to t=0
1	SH-SY5Y RNF170 KO 0 h	2.77329e+06	4.6652e+06	0.594464	1		1	SH-SY5Y Cl. 71 + RNF170 WT 0 h	2.31489e+06	2.36461e+06	0.978974	1
2	SH-SY5Y RNF170 KO 2 h	1820829	4.74877e+06	0.383432	0.645004		2	SH-SY5Y Cl. 71 + RNF170 WT 2 h	1.79258e+06	2.73724e+06	0.654887	0.668952
3	SH-SY5Y RNF170 KO 4 h	1.72171e+06	4.47873e+06	0.384418	0.646663		3	SH-SY5Y Cl. 71 + RNF170 WT 4 h	1.71756e+06	2.76349e+06	0.621518	0.634866
4	SH-SY5Y alt 0 h	1.65202e+06	4.49147e+06	0.367812	1
5	SH-SY5Y alt 2 h	1.11366e+06	4.49253e+06	0.247893	0.673966
6	SH-SY5Y alt 4 h	1.21221e+06	4.63003e+06	0.261816	0.711819
WB 9							WB 10
Quantification Data:
WB 9:							WB 10:
	Cell lines	IP3R-1	Vinculin	normalized to Vinculin	each sample normalized to t=0			Cell lines	IP3R-1	Vinculin	normalized to Vinculin	each sample normalized to t=0
1	SH-SY5Y RNF170 KO 0 h	4343160	2.56705e+06	1.69189	1		1	SH-SY5Y Cl. 71 + RNF170 WT 0 h	1.97833e+06	2.54574e+06	0.777114	1
2	SH-SY5Y RNF170 KO 2 h	2552156	2.61716e+06	0.975162	0.576374		2	SH-SY5Y Cl. 71 + RNF170 WT 2 h	1.61514e+06	2.2616e+06	0.714157	0.918986
3	SH-SY5Y RNF170 KO 4 h	1872260	2.03845e+06	0.918473	0.542868		3	SH-SY5Y Cl. 71 + RNF170 WT 4 h	1.78322e+06	1.952e+06	0.913535	1.17555
4	SH-SY5Y alt 0 h	3.37084e+06	3.61934e+06	0.931342	1
5	SH-SY5Y alt 2 h	2.02864e+06	3.4039e+06	0.595976	0.639911
6	SH-SY5Y alt 4 h	1.98661e+06	2.32653e+06	0.853896	0.916844
WB 11							WB 12
Quantification Data:
WB 11:							WB 12:
	Cell lines	IP3R-1	Vinculin	normalized to Vinculin	each sample normalized to t=0			Cell lines	IP3R-1	Vinculin	normalized to Vinculin	each sample normalized to t=0
1	SH-SY5Y RNF170 KO 0 h	3.97862e+06	5.18215e+06	0.767755	1		1	SH-SY5Y Cl. 71 + RNF170 WT 0 h	1.28356e+06	3.43436e+06	0.373741	1
2	SH-SY5Y RNF170 KO 2 h	2.78487e+06	2.85251e+06	0.976288	1.27161		2	SH-SY5Y Cl. 71 + RNF170 WT 2 h	1.28319e+06	3.68956e+06	0.347791	0.930568
3	SH-SY5Y RNF170 KO 4 h	2.26039e+06	2.19858e+06	1.02811	1.33912		3	SH-SY5Y Cl. 71 + RNF170 WT 4 h	1091772	3.76426e+06	0.290036	0.776036
4	SH-SY5Y alt 0 h	1.90356e+06	2.48433e+06	0.766226	1
5	SH-SY5Y alt 2 h	1.58259e+06	3.65171e+06	0.433384	0.565609
6	SH-SY5Y alt 4 h	2.0946e+06	2.82889e+06	0.740432	0.966336
WB 13					WB 14					WB 15					WB 16
SHSY5Y		IP3R1	Vinculin		Ratio IP3/Vinculin		normalized to 1		normalized to 100%
WB 13
KO 0h		3.7552e+07	9.76208e+07		0.384672		1		100
KO 2h		5.12711e+07	8.7686e+07		0.584713		1.52003		152.003
KO 4h		56523189	8.0716e+07		0.700272		1.08494		108.494
wt 0h		5.84702e+07	9.43047e+07		0.620013		1		100
wt 2h		4.34238e+07	9.63446e+07		0.450713		0.726942		72.6942
wt 4h		3.97882e+07	8.72553e+07		0.455997		0.735463		73.5463
SHSY5Y KO		5.28566e+07	6.65506e+07		0.794231
SHSY5Y wt		5.57626e+07	9.8657e+07		0.565217
SHSY5Y wt		2.75343e+07	5.75334e+07		0.478579
WB 14
KO 0h		2.97272e+07	9.3773e+07		0.317013		1		100
KO 2h		3.29169e+07	7.52751e+07		0.437288		1.3794		137.94
KO 4h		3.93362e+07	7.61484e+07		0.516572		1.6295		162.95
wt 0h		5.47617e+07	9.40376e+07		0.582338		1		100
wt 2h		3.62039e+07	8.60135e+07		0.420909		0.722792		72.2792
wt 4h		3.93318e+07	8.15231e+07		0.482462		0.828492		82.8492
SHSY5Y KO		3.90447e+07	6.65445e+07		0.586746
SHSY5Y wt		4.55291e+07	1.01886e+08		0.446863
SHSY5Y wt		3.5588e+07	5.73884e+07		0.620125
WB 15
KO 0h		3.20799e+07	5.94474e+07		0.539635		1		100
KO 2h		4.12633e+07	5.43919e+07		0.758629		1.40582		140.582
KO 4h		4.30181e+07	5.44576e+07		0.789939		1.46384		146.384
wt 0h		5.52239e+07	8.92685e+07		0.618627		1		100
wt 2h		4.59009e+07	7.38709e+07		0.621366		1.00443		100.443
wt 4h		4.62919e+07	7.90344e+07		0.585718		0.946804		94.6804
SHSY5Y wt		4.7506e+07	5.06009e+07		0.938837
SHSY5Y wt		5.12306e+07	8.25576e+07		0.620543
WB 16
KO 0h		2.90005e+07	7.1009e+07		0.408406		1		100
KO 2h		3.19202e+07	4.85615e+07		0.657315		1.60946		160.946
KO 4h		3.92652e+07	4.60674e+07		0.852343		2.087		208.7
wt 0h		4.65605e+07	4.89786e+07		0.95063		1		100
wt 2h		3.71642e+07	5.37727e+07		0.691135		0.727029		72.7029
wt 4h		2.98216e+07	5.68523e+07		0.524546		0.551787		55.1787
SHSY5Y wt		2.64234e+07	5.24681e+07		0.503608
SHSY5Y wt		3.8436e+07	7.9445e+07		0.483806
WB 17:						WB 18:						WB 19:
SHSY5Y
	IPR31	Vinculin	IP3R1 / Vinculin		normalized to 1		normalized to 100%
WB 17
wt 0h	31506983	5.08803e+07	0.619237		1		100
wt 2h	2.87352e+07	4.95589e+07	0.57982		0.936346		93.6346
wt 4h	21412967	4.2103e+07	0.508585		0.82131		82.131
WB 18
wt 0h	26368893	3.78664e+07	0.696366		1		100
wt 2h	16059132	5.07931e+07	0.316167		0.454024		45.4024
wt 4h	15780072	4.05748e+07	0.388913		0.55849		55.849
WB 19
wt 0h	2.0046e+07	3.38154e+07	0.592808		1		100
wt 2h	1.78119e+07	3.32427e+07	0.535813		0.903856		90.3856
wt 4h	1.74266e+07	2.75877e+07	0.631681		1.06557		106.557
